# Supplementary material for: The Alignment of Dietary Intake and Symptom-Reporting Capture Periods in Studies Assessing Associations between Food and Functional Gastrointestinal Disorder Symptoms: A Systematic Review
Source: MDPI journal article supplement (doi:10.3390/nu11112590), 2019-10-28
Supplement: s1 [file s1]

**Supplementary Table 1: Systematic review protocol of dietary factors that influence functional dyspepsia**

Searches conducted Monday 22<sup>nd</sup> April 2019 in the following databases: MEDLINE, Medline in process, EMBASE, PsycINFO and the Cochrane central register of controlled trials.

**Example Database(s): MEDLINE 2000 to Present with Daily Update**

**Search Strategy:**

| #  | Searches                                                                                                                                                                                                                                                                                                                                                                                |
|----|-----------------------------------------------------------------------------------------------------------------------------------------------------------------------------------------------------------------------------------------------------------------------------------------------------------------------------------------------------------------------------------------|
| 1  | Dyspepsia/                                                                                                                                                                                                                                                                                                                                                                              |
| 2  | Heartburn/                                                                                                                                                                                                                                                                                                                                                                              |
| 3  | Eructation/                                                                                                                                                                                                                                                                                                                                                                             |
| 4  | (acid reflux or heartburn or regurgitation or belch* or bloat* or indigestion).tw.                                                                                                                                                                                                                                                                                                      |
| 5  | ((disturb* or disorder* or dysfunction* or condition* or discomfort* or pain* or distress* or burn* or fullness*) adj postprandial).tw.                                                                                                                                                                                                                                                 |
| 6  | (dyspep* adj (functional or non ulcer or nonulcer)).tw.                                                                                                                                                                                                                                                                                                                                 |
| 7  | (indigestion adj (intestin* or digest* or gastr* or gut or epigastr* or stomach*)).tw.                                                                                                                                                                                                                                                                                                  |
| 8  | (epigastric adj (pain* or burn*)).tw.                                                                                                                                                                                                                                                                                                                                                   |
| 9  | Rome criteria.tw.                                                                                                                                                                                                                                                                                                                                                                       |
| 10 | ((Gastroduodenal or gastrointestinal) adj symptom*).tw.                                                                                                                                                                                                                                                                                                                                 |
| 11 | early satiety.tw.                                                                                                                                                                                                                                                                                                                                                                       |
| 12 | ((gastric or stomach or symptom*) adj acid adj secretion).tw.                                                                                                                                                                                                                                                                                                                           |
| 13 | 1 or 2 or 3 or 4 or 5 or 6 or 7 or 8 or 9 or 10 or 11 or 12                                                                                                                                                                                                                                                                                                                             |
| 14 | Dietary Fats, Unsaturated/ or Dietary Fats/ or Fats, Unsaturated/ or Fats/                                                                                                                                                                                                                                                                                                              |
| 15 | exp Carbohydrates/                                                                                                                                                                                                                                                                                                                                                                      |
| 16 | exp Dietary Fiber/                                                                                                                                                                                                                                                                                                                                                                      |
| 17 | Proteins/                                                                                                                                                                                                                                                                                                                                                                               |
| 18 | exp Seafood/                                                                                                                                                                                                                                                                                                                                                                            |
| 19 | Nuts/                                                                                                                                                                                                                                                                                                                                                                                   |
| 20 | exp Soy Foods/                                                                                                                                                                                                                                                                                                                                                                          |
| 21 | Albumins/                                                                                                                                                                                                                                                                                                                                                                               |
| 22 | Globulins/                                                                                                                                                                                                                                                                                                                                                                              |
| 23 | glutens/ or gliadin/                                                                                                                                                                                                                                                                                                                                                                    |
| 24 | Salicylates/                                                                                                                                                                                                                                                                                                                                                                            |
| 25 | Amines/                                                                                                                                                                                                                                                                                                                                                                                 |
| 26 | exp Alcoholic Beverages/                                                                                                                                                                                                                                                                                                                                                                |
| 27 | Fruit/                                                                                                                                                                                                                                                                                                                                                                                  |
| 28 | Vegetables/                                                                                                                                                                                                                                                                                                                                                                             |
| 29 | Edible Grain/                                                                                                                                                                                                                                                                                                                                                                           |
| 30 | exp Meat/                                                                                                                                                                                                                                                                                                                                                                               |
| 31 | exp Dairy Products/                                                                                                                                                                                                                                                                                                                                                                     |
| 32 | Snacks/                                                                                                                                                                                                                                                                                                                                                                                 |
| 33 | Probiotics/                                                                                                                                                                                                                                                                                                                                                                             |
| 34 | (saturated fat* or unsaturated fat* or carbohydrate* or fibre or fiber or fodmap* or sugar or protein* or food allergen* or fish or seafood* or egg* or nuts or soy or wheat protein* or albumin or globulin or gliadin or gluten* or salicylate* or amine or glutamate* or alcohol* or beer* or wine* or spirits or fruit* or vegetable* or grain* or meat or dairy or probiotic*).tw. |
| 35 | ((snack* or treat* or junk or discretionary) adj5 food*).tw.                                                                                                                                                                                                                                                                                                                            |
| 36 | 14 or 15 or 16 or 17 or 18 or 19 or 20 or 21 or 22 or 23 or 24 or 25 or 26 or 27 or 28 or 29 or 30 or 31 or 32                                                                                                                                                                                                                                                                          |

|    |                                                                                                             |
|----|-------------------------------------------------------------------------------------------------------------|
|    | or 33 or 34 or 35                                                                                           |
| 37 | ((assess* or measure* or survey* or questionnaire* or record* or diary* or tool*) adj (diet* or food*)).tw. |
| 38 | ((assess* or measure* or tool*) adj (nutrition* or nutrient*)).tw                                           |
| 39 | Food frequency questionnaire/ or FFQ/                                                                       |
| 40 | Food diary/                                                                                                 |
| 41 | Weighed food record/ or WFR/                                                                                |
| 42 | 37 or 38 or 39 or 40 or 41                                                                                  |
| 43 | 13 and 36 and 42                                                                                            |
| 44 | limit 43 to (english language and yr="2000 -Current" and ("all adult (18 plus years)" or                    |
