# Supplementary material for: The Alignment of Dietary Intake and Symptom-Reporting Capture Periods in Studies Assessing Associations between Food and Functional Gastrointestinal Disorder Symptoms: A Systematic Review
Source: MDPI journal article supplement (doi:10.3390/nu11112590), 2019-10-28
Supplement: s1 [file s1]

Supplementary Table 2: Participants, interventions, comparisons, outcomes and study design (PICOS) used to systematically review relationship between food ingestion and symptom reporting in functional gastrointestinal disorders

| PICOS concepts | Criteria for systematic review                                                                            |
|----------------|-----------------------------------------------------------------------------------------------------------|
| Participants   | Adults (18 years and over) with diagnosed, uncomplicated irritable bowel syndrome or functional dyspepsia |
| Interventions  | Food ingestion                                                                                            |
| Comparisons    | Not applicable                                                                                            |
| Outcomes       | Symptom induction or presence of symptoms                                                                 |
| Study Design   | RCT, cohort, cross sectional                                                                              |
